# Supplementary material
Source: HighWire-hosted journal article supplement (https://erj.ersjournals.com/content/58/4/2101105)
Supplement: inline-supplementary-material-1 [file inline-supplementary-material-1.pdf]

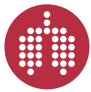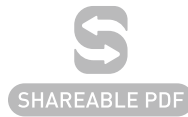

# A new piece in the puzzle: the eosinophil and the development of COPD

Nayia Petousi <sup>1,2</sup>, Abigail Wooden<sup>3</sup> and Richard E.K. Russell <sup>1,2</sup>

<sup>1</sup>Nuffield Department of Clinical Medicine, University of Oxford, Oxford, UK. <sup>2</sup>Oxford Centre for Respiratory Medicine, Oxford University Hospitals, Oxford, UK. <sup>3</sup>Southampton University Hospital, Southampton, UK.

Corresponding author: Richard E.K. Russell ([richard.russell@ndm.ox.ac.uk](mailto:richard.russell@ndm.ox.ac.uk))

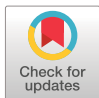

Shareable abstract (@ERSpublications)

**A large prospective population study has clearly demonstrated that blood eosinophils predict the development of airflow obstruction. This insight leads to the potential for early targeted intervention to prevent this happening.** <https://bit.ly/3vk7mBu>

**Cite this article as:** Petousi N, Wooden A, Russell REK. A new piece in the puzzle: the eosinophil and the development of COPD. *Eur Respir J* 2021; 58: 2101105 [DOI: 10.1183/13993003.01105-2021].

This single-page version can be shared freely online.

Copyright ©The authors 2021. For reproduction rights and permissions contact [permissions@ersnet.org](mailto:permissions@ersnet.org)

Received: 16 April 2021  
Accepted: 21 April 2021

COPD is associated with high morbidity and mortality worldwide, with overall high personal, societal and economic impact [1].
